# Supplementary material for: Synthesis and characterization of the hydrated rare-earth acid diphosphates LnHP2O7·3.5H2O (Ln = rare-earth elements)
Source: Royal Society of Chemistry journal article supplement (doi:10.1039/b000543f), 2000-01-01
Supplement: b000543f.doc [file b000543f.doc]

TABLE 1 X-Ray diffraction pattern of HLaP2O73.5H2O recorded at room temperature.

ELECTRONIC SUPPLEMENTARY DATA

|  | 2obs |  | dobs(Å) | I/I0 | h | k | l | (2) |
| --- | --- | --- | --- | --- | --- | --- | --- | --- |
| 1 | 9.555 |  | 9.25 | 100 | 2 | 0 | 0 | -0.004 |
| 2 | 11.556 |  | 7.65 | 1 | 2 | 1 | 0 | -0.005 |
| 3 | 12.994 |  | 6.81 | 2 | 0 | 2 | 0 | -0.002 |
| 4 | 15.237 |  | 5.81 | 4 | 1 | 1 | 1 | 0.008 |
| 5 | 16.162 |  | 5.48 | 5 | 2 | 2 | 0 | 0.004 |
| 6 | 18.972 |  | 4.67 | 1 | 1 | 2 | 1 | 0.000 |
| 7 | 19.197 |  | 4.62 | 6 | 4 | 0 | 0 | 0.011 |
| 8 | 20.277 |  | 4.38 | 7 | 4 | 1 | 0 | 0.004 |
| 9 | 20.432 |  | 4.34 | 6 | 3 | 1 | 1 | 0.005 |
| 10 | 21.797 |  | 4.07 | 1 | 2 | 3 | 0 | -0.004 |
| 11 | 23.382 |  | 3.801 | 3 | 3 | 2 | 1 | 0.004 |
| 12 | 23.987 |  | 3.707 | 1 | 1 | 3 | 1 | 0.003 |
| 13 | 25.962 |  | 3.429 | 2 | 0 | 0 | 2 | -0.005 |
| 14 | 26.167 |  | 3.403 | 2 | 0 | 4 | 0 | 0.004 |
| 15 | 27.532 |  | 3.237 | 3 | 4 | 3 | 0 | 0.009 |
| 16 | 27.742 |  | 3.213 | 3 | 2 | 0 | 2 | 0.013 |
| 17 | 28.172 |  | 3.165 | 6 | 5 | 1 | 1 | 0.005 |
| 18 | 28.489 |  | 3.130 | 1 | 2 | 1 | 2 | -0.019 |
| 19 | 28.957 |  | 3.081 | 4 | 6 | 0 | 0 | 0.006 |
| 20 | 29.143 |  | 3.062 | 1 | 0 | 2 | 2 | 0.003 |
| 21 | 29.682 |  | 3.007 | 8 | 1 | 4 | 1 | 0.005 |
| 22 | 30.417 |  | 2.9354 | 1 | 5 | 2 | 1 | 0.010 |
| 23 | 32.487 |  | 2.7538 | 1 | 4 | 0 | 2 | -0.001 |
| 24 | 32.752 |  | 2.7321 | 2 | 3 | 4 | 1 | 0.004 |
| 25 | 33.157 |  | 2.6997 | 1 | 4 | 1 | 2 | -0.008 |
| 26 | 33.845 |  | 2.6464 | 1 | 5 | 3 | 1 | -0.021 |
| 27 | 34.307 |  | 2.6118 | 1 | 2 | 5 | 0 | -0.001 |
| 28 | 35.177 |  | 2.5492 | 2 | 6 | 3 | 0 | 0.002 |
| 29 | 35.787 |  | 2.5071 | 1 | 1 | 5 | 1 | 0.000 |
| 30 | 37.037 |  | 2.4253 | 8 | 7 | 1 | 1 | 0.001 |
| 31 | 38.192 |  | 2.3546 | 2 | 4 | 3 | 2 | -0.007 |
| 32 | 38.344 |  | 2.3456 | 1 | 4 | 5 | 0 | 0.006 |
| 33 | 38.822 |  | 2.3178 | 1 | 7 | 2 | 1 | -0.004 |
| 34 | 39.522 |  | 2.2783 | 1 | 8 | 1 | 0 | 0.004 |
| 35 | 39.842 |  | 2.2608 | 1 | 6 | 1 | 2 | -0.013 |
| 36 | 40.927 |  | 2.2033 | 1 | 2 | 6 | 0 | 0.003 |
| 37 | 41.942 |  | 2.1523 | 1 | 1 | 2 | 3 | -0.005 |
| 38 | 42.197 |  | 2.1399 | 1 | 1 | 6 | 1 | -0.007 |
| 39 | 42.667 |  | 2.1174 | 1 | 3 | 1 | 3 | -0.009 |
| 40 | 43.302 |  | 2.0878 | 1 | 5 | 5 | 1 | 0.011 |
| 41 | 43.517 |  | 2.0780 | 1 | 2 | 5 | 2 | -0.009 |
| 42 | 43.950 |  | 2.0585 | 1 | 8 | 3 | 0 | 0.021 |

|  | 2obs |  | dobs(Å) | I/I0 | h | k | l | (2) |
| --- | --- | --- | --- | --- | --- | --- | --- | --- |
| 43 | 44.236 |  | 2.0459 | 3 | 6 | 3 | 2 | -0.003 |
| 44 | 44.293 |  | 2.0434 | 1 | 3 | 2 | 3 | 0.017 |
| 45 | 44.367 |  | 2.0401 | 3 | 6 | 5 | 0 | 0.005 |
| 46 | 45.392 |  | 1.9964 | 1 | 7 | 4 | 1 | -0.004 |
| 47 | 46.592 |  | 1.9477 | 2 | 9 | 1 | 1 | -0.001 |
| 48 | 46.862 |  | 1.9372 | 1 | 3 | 3 | 3 | 0.017 |
| 49 | 47.202 |  | 1.9240 | 1 | 5 | 1 | 3 | 0.019 |
| 50 | 47.403 |  | 1.9163 | 1 | 8 | 0 | 3 | 0.003 |
| 51 | 49.116 |  | 1.853 | 1 | 2 | 6 | 2 | 0.007 |
| 52 | 49.232 |  | 1.8493 | 1 | 10 | 0 | 0 | -0.010 |
| 53 | 49.857 |  | 1.8276 | 1 | 7 | 5 | 1 | -0.009 |
| 54 | 50.257 |  | 1.8140 | 1 | 3 | 4 | 3 | -0.015 |
| 55 | 50.957 |  | 1.7907 | 1 | 3 | 7 | 1 | -0.012 |
| 56 | 51.142 |  | 1.7846 | 1 | 10 | 2 | 0 | -0.011 |
| 57 | 51.837 |  | 1.7623 | 1 | 8 | 5 | 0 | -0.012 |
| 58 | 52.104 |  | 1.7539 | 1 | 6 | 5 | 2 | -0.018 |
| 59 | 53.407 |  | 1.7142 | 1 | 0 | 0 | 4 | 0.003 |
| 60 | 53.749 |  | 1.7041 | 1 | 9 | 4 | 1 | -0.014 |
| 61 | 53.835 |  | 1.7015 | 1 | 0 | 8 | 0 | 0.004 |
| 62 | 54.392 |  | 1.6854 | 1 | 2 | 0 | 4 | 0.004 |
| 63 | 54.802 |  | 1.6738 | 1 | 2 | 8 | 0 | -0.009 |
| 64 | 54.952 |  | 1.6696 | 1 | 5 | 7 | 1 | -0.005 |
| 65 | 55.846 |  | 1.6449 | 1 | 1 | 8 | 1 | 0.002 |
| 66 | 56.497 |  | 1.6275 | 1 | 10 | 0 | 2 | -0.005 |
| 67 | 57.712 |  | 1.5961 | 1 | 4 | 1 | 4 | 0.003 |
| 68 | 58.057 |  | 1.5874 | 1 | 11 | 2 | 1 | 0.002 |
| 69 | 58.257 |  | 1.5825 | 1 | 5 | 5 | 3 | -0.009 |
| 70 | 58.871 |  | 1.5674 | 1 | 8 | 5 | 2 | -0.012 |
| 71 | 59.987 |  | 1.5409 | 1 | 12 | 0 | 0 | -0.005 |
| 72 | 60.419 |  | 1.5309 | 1 | 0 | 4 | 4 | 0.004 |
| 73 | 60.625 |  | 1.5262 | 1 | 7 | 7 | 1 | 0.024 |
| 74 | 60.966 |  | 1.5185 | 1 | 9 | 1 | 3 | -0.004 |
| 75 | 61.136 |  | 1.5147 | 1 | 4 | 3 | 4 | 0.017 |
| 76 | 61.637 |  | 1.5035 | 1 | 2 | 8 | 2 | 0.017 |
| 77 | 62.377 |  | 1.4875 | 1 | 8 | 7 | 0 | 0.026 |
| 78 | 63.106 |  | 1.4720 | 1 | 11 | 4 | 1 | -0.005 |
| 79 | 63.729 |  | 1.4591 | 1 | 7 | 5 | 3 | 0.003 |
| 80 | 64.669 |  | 1.4402 | 1 | 3 | 7 | 3 | -0.001 |
| 81 | 64.836 |  | 1.4369 | 1 | 3 | 9 | 1 | -0.025 |
| 82 | 65.034 |  | 1.4330 | 1 | 2 | 5 | 4 | 0.007 |
| 83 | 67.624 |  | 1.3843 | 1 | 4 | 5 | 4 | -0.009 |
| 84 | 68.751 |  | 1.3643 | 1 | 13 | 2 | 1 | 0.004 |

TABLE 2 X-Ray diffraction pattern of YbHP2O7.3H2O recorded at room temperature.

ELECTRONIC SUPPLEMENTARY DATA

|  | 2obs |  | dobs(Å) | I/I0 | h | k | l | (2) |
| --- | --- | --- | --- | --- | --- | --- | --- | --- |
| 1 | 9.273 |  | 9.53 | 100 | 0 | 0 | 1 | 0.008 |
| 2 | 13.125 |  | 6.74 |  | 0 | 1 | 0 | 0.009 |
| 3 | 14.095 |  | 6.28 | 1 | 1 | 0 | 0 | 0.004 |
| 4 | 14.975 |  | 5.91 |  | 0 | 1 | 1 | 0.010 |
| 5 | 15.495 |  | 5.71 | 3 | 1 | 0 | 1 | -0.002 |
| 6 | 17.128 |  | 5.17 |  | 0 | -1 | 1 | 0.000 |
| 7 | 18.185 |  | 4.87 | 11 | -1 | 0 | 1 | 0.006 |
| 8 | 18.600 |  | 4.77 | 17 | 0 | 0 | 2 | 0.010 |
| 9 | 19.338 |  | 4.59 | 7 | -1 | 1 | 0 | -0.003 |
| 10 | 19.440 |  | 4.56 | 6 | 1 | 1 | 1 | 0.007 |
| 11 | 21.245 |  | 4.18 | 5 | 1 | -1 | 1 | 0.007 |
| 12 | 21.354 |  | 4.16 |  | 1 | 0 | 2 | -0.009 |
| 13 | 21.719 |  | 4.09 |  | -1 | 1 | 1 | -0.008 |
| 14 | 23.670 |  | 3.576 | 3 | 1 | 1 | 2 | 0.003 |
| 15 | 24.315 |  | 3.658 | 2 | 0 | 1 | -2 | 0.000 |
| 16 | 25.290 |  | 3.519 | 15 | -1 | 0 | 2 | 0.002 |
| 17 | 26.410 |  | 3.372 | 9 | 0 | 2 | 0 | 0.001 |
| 18 | 26.560 |  | 3.353 | 1 | 1 | -1 | 2 | 0.005 |
| 19 | 26.750 |  | 3.330 | 7 | 0 | 2 | 1 | 0.007 |
| 20 | 27.345 |  | 3.259 |  | -1 | 1 | 2 | 0.001 |
| 21 | 28.050 |  | 3.179 | 9 | 0 | 0 | 3 | 0.007 |
| 22 | 28.345 |  | 3.146 | 3 | 2 | 0 | 1 | 0.006 |
| 23 | 29.210 |  | 3.055 | 4 | 1 | 0 | 3 | 0.001 |
| 24 | 29.293 |  | 3.046 | 3 | 0 | 1 | 3 | 0.004 |
| 25 | 29.795 |  | 2.9962 |  | -1 | -1 | 2 | 0.010 |
| 26 | 29.997 |  | 2.9765 |  | 1 | 2 | 0 | 0.001 |
| 27 | 30.200 |  | 2.9570 | 2 | 0 | 2 | 2 | 0.008 |
| 28 | 30.385 |  | 2.9394 | 1 | 1 | 1 | 3 | 0.003 |
| 29 | 30.710 |  | 2.9090 | 2 | 2 | 1 | 1 | 0.003 |
| 30 | 31.163 |  | 2.8677 | 1 | -1 | 2 | 1 | -0.005 |
| 31 | 31.343 |  | 2.8517 | 4 | 2 | 1 | 0 | -0.002 |
| 32 | 31.461 |  | 2.8412 | 2 | -2 | 0 | 1 | 0.004 |
|  |  |  |  |  |  |  |  |  |
| 33 | 31.970 |  | 2.7972 | 4 |
|  |  |  |  |  |
| 34 | 32.780 |  | 2.7299 | 1 | 0 | 1 | -3 | 0.010 |

a Shoulder of previous reflection.

b Shoulder of following reflection

c Complex shoulder of following reflection

|  | 2obs | |  | | dobs(Å) | I/I0 | | | h | | k | l | | (2) | |
| --- | --- | --- | --- | --- | --- | --- | --- | --- | --- | --- | --- | --- | --- | --- | --- |
| 35 | 32.918 | |  | | 2.7187 | 4 | | | 2 | | 1 | 2 | | -0.001 | |
| 36 | 33.303 | |  | | 2.6882 | 2 | | | 1 | | 2 | -1 | | 0.002 | |
| 37 | 33.683 | |  | | 2.6587 | 5 | | | -1 | | 0 | 3 | | 0.005 | |
| 38 | 33.727 | |  | | 2.6554 | 3 | | | -2 | | 1 | 1 | | -0.004 | |
| a | 33.816 |  | | 2.6486 | | | 2 | -1 | | 1 | | | 3 | | 0.002 |
|  | 34.683 |  | | 2.5843 | | | 3 | 2 | | 1 | | -1 | | | 0.008 |
| 41 | 34.896 | |  | | 2.5690 | 7 | | | -1 | | 2 | 2 | | -0.001 | |
| 42 | 35.165 | |  | | 2.5500 | 3 | | | -2 | | 1 | -2 | | 0.004 | |
| 43 | 35.940 | |  | | 2.4968 |  | | | 0 | | 2 | 3 | | -0.007 | |
| 44 | 36.590 | |  | | 2.4539 | 1 | | | 2 | | 0 | 3 | | -0.001 | |
|  |  | |  | |  |  | | |  | |  |  | |  | |
| 45 | 36.835 | |  | | 2.4381 | 1 | | |
|  |  | |  | |  |  | | |
| 46 | 37.525 | |  | | 2.3949 | 2 | | | 2 | | 1 | 3 | | -0.009 | |
| 47 | 37.700 | |  | | 2.3842 | 4 | | | 0 | | 0 | 4 | | 0.006 | |
| 48 | 37.970 | |  | | 2.3678 | 2 | | | 1 | | 0 | 4 | | -0.002 | |
| 49 | 38.179 | |  | | 2.3553 | 2 | | | 0 | | 1 | 4 | | -0.001 | |
| 50 | 38.422 | |  | | 2.3410 | 2 | | | 1 | | 1 | 4 | | -0.009 | |
| 51 | 38.786 | |  | | 2.3199 | 1 | | | 1 | | 2 | -2 | | -0.004 | |
| 52 | 40.149 | |  | | 2.2442 |  | | | -2 | | 2 | -1 | | -0.003 | |
| 53 | 40.480 | |  | | 2.2266 | 1 | | | -2 | | 1 | -3 | | 0.002 | |
| 54 | 40.661 | |  | | 2.2171 | 1 | | | -1 | | 2 | 3 | | 0.003 | |
| 55  b | 41.668 | |  | | 2.1658 | 1 | | | 0 | | 2 | -3 | | -0.007 | |
| 56 | 41.820 | |  | | 2.1583 | 1 | | | 1 | | 3 | 1 | | 0.002 | |
| 57 | 41.885 | |  | | 2.1551 | 2 | | | 0 | | 3 | 2 | | -0.013 | |
| 58 | 42.172 | |  | | 2.1411 | 1 | | | -1 | | 1 | -4 | | -0.003 | |
| 59 | 42.569 | |  | | 2.1220 | 1 | | | 0 | | 3 | -1 | | 0.003 | |
| 60 | 42.765 | |  | | 2.1128 | 5 | | | -1 | | 0 | 4 | | -0.006 | |
| c | 43.040 | |  | | 2.0999 |  | | | 2 | | 2 | 3 | | 0.001 | |
|  | 43.104 | |  | | 2.0969 | 1 | | | -1 | | 3 | 1 | | 0.005 | |
| 63  c | 43.191 | |  | | 2.0929 | 2 | | | 3 | | 0 | 0 | | 0.009 | |
| 64 | 43.439 | |  | | 2.0815 | 1 | | | 1 | | 2 | 4 | | 0.010 | |
| 65 | 43.512 | |  | | 2.0782 | 2 | | | 2 | | 0 | 4 | | -0.006 | |
| 66 | 43.815 | |  | | 2.0645 | 1 | | | -2 | | 0 | 3 | | -0.002 | |
| 67 | 43.915 | |  | | 2.0601 |  | | | 2 | | 1 | 4 | | 0.007 | |
| 70 | 44.131 | |  | | 2.0505 | 2 | | | 3 | | 0 | 2 | | -0.006 | |
